# Supplementary material
Source: ML conference proceedings conference paper supplement (https://openreview.net/forum?id=uUU05MP7Pv7)
Supplement: supplementary_material [file attachment]

## A APPENDIX: ADDITIONAL EXPERIMENTAL RESULTS ON COMPAS DATASET

We note that for the specific dataset, the training might not converge when  $\lambda$  becomes too large, because the over-focus on reference domain smoothing might affect the model’s accuracy on the data. As highlighted in **red values**, the performance of WFDS becomes worse when  $\lambda = 0.9$  on COMPAS dataset. Surprisingly, we found that worst-fair training might hurt the performance of WFDS on the compas data. We believe that this inconsistent and unstable behavior of WFDS due to data scarcity,

Table 4: Robustness study for WFDS with different global domain smoothing strength on COMPAS.

| Dataset | $\lambda$ | $\mathcal{A}_B \uparrow$            | $\mathcal{A}_{sub} \downarrow$      | $\Phi_D \downarrow$                 | $\Phi_E \downarrow$                 |
|---------|-----------|-------------------------------------|-------------------------------------|-------------------------------------|-------------------------------------|
| COMPAS  | 0.1       | $0.668 \pm 0.004$                   | $0.262 \pm 0.114$                   | $0.106 \pm 0.027$                   | $0.129 \pm 0.056$                   |
|         | 0.3       | $0.668 \pm 0.006$                   | $0.243 \pm 0.117$                   | $0.098 \pm 0.029$                   | $0.111 \pm 0.061$                   |
|         | 0.5       | $0.667 \pm 0.005$                   | $0.248 \pm 0.110$                   | $0.096 \pm 0.025$                   | $0.106 \pm 0.051$                   |
|         | 0.7       | <b><math>0.668 \pm 0.004</math></b> | <b><math>0.192 \pm 0.058</math></b> | <b><math>0.082 \pm 0.009</math></b> | <b><math>0.077 \pm 0.019</math></b> |
|         | 0.9       | <b><math>0.601 \pm 0.078</math></b> | <b><math>0.892 \pm 0.905</math></b> | $0.052 \pm 0.036$                   | $0.052 \pm 0.049$                   |

Table 5: Ablation study of WFDS on COMPAS.

| COMPAS                    | BA $\uparrow$                       | A.G. $\downarrow$                   | D.P. $\downarrow$                   | E.O. $\downarrow$                   |
|---------------------------|-------------------------------------|-------------------------------------|-------------------------------------|-------------------------------------|
| <b>WFDS MMD</b>           | <b><math>0.668 \pm 0.004</math></b> | $0.192 \pm 0.058$                   | $0.082 \pm 0.009$                   | $0.077 \pm 0.019$                   |
| w/o Worst-Fair Training   | $0.667 \pm 0.003$                   | <b><math>0.164 \pm 0.101</math></b> | <b><math>0.072 \pm 0.021</math></b> | <b><math>0.063 \pm 0.037</math></b> |
| w/o Ref. Domain Smoothing | $0.665 \pm 00.04$                   | $0.323 \pm 0.064$                   | $0.121 \pm 0.015$                   | $0.161 \pm 0.032$                   |

## B APPENDIX: TRAINING ALGORITHM: PSEUDOCODE

---

### Algorithm 1: Worst-Fair Domain Smoothing on Client $k$

---

```

1 Inputs local data  $\mathbf{X}_k$ , global model  $f_\theta$ , reference distribution  $\mathcal{Q}$ ;
2 Hyperparameters: Number of iteration  $E$ , batch size  $B$ , scaling factor  $\lambda$  adversarial radius  $\epsilon$ , number of
  steps for PGD  $S$  and step size of PGD  $\eta$ ;
3 Output: fair local model  $f_{\theta_k}$ ;
4 Initialize local model  $f_{\theta_k} = f_\theta$ ;
5 for  $e = 1, 2, \dots, E$  do
6   Load a mini-batch  $\mathbf{B}_k$  from  $\mathbf{X}_k$ ;
7   Load a mini-batch  $\mathbf{B}_Q$  from  $\mathcal{Q}$ ;
  // 1. Generate fairness-adversarial examples
8   for  $\mathbf{x}_i \in \mathbf{B}_k$  do
9     Initialize  $\mathbf{x}'_i = \mathbf{x}_i$ ;
10    for  $s = 1, 2, \dots, S$  do
11       $\mathcal{L}(\mathbf{x}'_i) = \hat{\phi}_*(f_{\theta_k}(\mathbf{x}'_i))$ ;
12       $\mathbf{x}_i = \Pi_{\mathbb{B}(\mathbf{x}'_i, \epsilon)}(\mathbf{x}'_i + \eta \text{sign} \nabla_{\mathbf{x}'_i} \hat{\phi}_*(f_{\theta_k}(\mathbf{x}'_i)))$ , where  $\Pi$  is the projection operator;
13    end
14    Replace  $\mathbf{x}_i$  with  $\mathbf{x}'_i$  in  $\mathbf{B}_k$ ;
15  end
  // 2. Compute the fairness-aware loss
16  Compute fairness loss  $\mathcal{L}_{fair}$  with Equation 11 over generated  $\mathbf{x}'$ ;
  // 3. Compute the global smoothing loss
17  Compute MMD loss  $\mathcal{L}_{MMD}$  with Equation 14 with perturbed  $\mathbf{x}'$  and  $\mathbf{B}_Q$ ;
18  Perform backpropagation and update  $f$ ;
  // 4. Update local model
19  Compute overall loss:  $\mathcal{L}_{all} = \mathcal{L}_{fair} + \lambda \mathcal{L}_{MMD}$ ;
20  Perform backpropagation and update  $f_{\theta_k}$ ;
21 end

```

---
